# Supplementary material for: A phase 1 study of the safety, tolerability, pharmacokinetics, and pharmacodynamics of TAK-063, a selective PDE10A inhibitor
Source: PubMed Central journal article supplement (PMC5063900; doi:10.1007/s00213-016-4412-9), 2016-08-30
Supplement: 213_2016_4412_MOESM1_ESM.pdf [file 213_2016_4412_MOESM1_ESM.pdf]

**A Phase 1 Study of the Safety, Tolerability, Pharmacokinetics, and Pharmacodynamics of TAK-063, a Selective PDE10A Inhibitor**

Max Tsai<sup>1</sup>, Lambros Chrones<sup>1</sup>, Jinhui Xie<sup>1</sup>, Hakop Gevorkyan<sup>2</sup>, and Thomas A. Macek<sup>1\*</sup>

<sup>1</sup>Takeda Development Center Americas, Inc., Deerfield, IL, USA; <sup>2</sup>California Clinical Trials Medical Group, Glendale, CA, USA

\*Corresponding author at: One Takeda Parkway, Deerfield, IL 60015. Tel: +1 224-554-2803; Fax: 224-554-3637

Email address: [tom.macek@takeda.com](mailto:tom.macek@takeda.com) (T. Macek)

## Online Resource 1

Treatment-emergent adverse events for Japanese subjects by dosing group

| Adverse event, n (%)       | Placebo<br>(n = 6) | TAK-063<br>3 mg<br>(n = 5) | TAK-063<br>10 mg<br>(n = 5) | TAK-063<br>30 mg<br>(n = 5) | TAK-063<br>100 mg<br>(n = 5) | TAK-063<br>300 mg<br>(n = 5) | TAK-063<br>1000 mg<br>(n = 5) | TAK-063<br>Total<br>(n = 30) |
|----------------------------|--------------------|----------------------------|-----------------------------|-----------------------------|------------------------------|------------------------------|-------------------------------|------------------------------|
| Somnolence                 | 0                  | 0                          | 0                           | 1 (20.0)                    | 4 (80.0)                     | 2 (40.0)                     | 3 (60.0)                      | 10 (33.3)                    |
| Orthostatic<br>tachycardia | 1 (16.7)           | 0                          | 0                           | 1 (20.0)                    | 0                            | 1 (20.0)                     | 3 (60.0)                      | 5 (16.7)                     |
| Orthostatic<br>hypotension | 1 (16.7)           | 0                          | 0                           | 0                           | 1 (20.0)                     | 1 (20.0)                     | 2 (40.0)                      | 4 (13.3)                     |
| Vomiting                   | 0                  | 0                          | 0                           | 0                           | 1 (20.0)                     | 0                            | 1 (20.0)                      | 2 (6.7)                      |
| Nausea                     | 0                  | 0                          | 0                           | 0                           | 0                            | 0                            | 1 (20.0)                      | 1 (3.3)                      |
| Dizziness                  | 0                  | 0                          | 0                           | 0                           | 0                            | 0                            | 1 (20.0)                      | 1 (3.3)                      |
| Headache                   | 0                  | 0                          | 0                           | 0                           | 1 (20.0)                     | 0                            | 0                             | 1 (3.3)                      |
| Epistaxis                  | 0                  | 0                          | 0                           | 1 (20.0)                    | 0                            | 0                            | 0                             | 1 (3.3)                      |
| Muscle tightness           | 0                  | 0                          | 0                           | 1 (20.0)                    | 0                            | 0                            | 0                             | 1 (3.3)                      |

## Online Resource 2

Treatment-emergent adverse events for non-Japanese subjects by dosing group

| Adverse event, n (%)    | Placebo<br>(n = 12) | TAK-063<br>3 mg<br>(n = 6) | TAK-063<br>10 mg<br>(n = 6) | TAK-063<br>30 mg<br>(n = 6) | TAK-063<br>100 mg<br>(n = 6) | TAK-063<br>300 mg<br>(n = 6) | TAK-063<br>1000 mg<br>(n = 6) | TAK-063<br>Total<br>(n = 36) |
|-------------------------|---------------------|----------------------------|-----------------------------|-----------------------------|------------------------------|------------------------------|-------------------------------|------------------------------|
| Somnolence              | 0                   | 0                          | 0                           | 3 (50.0)                    | 3 (50.0)                     | 3 (50.0)                     | 3 (50.0)                      | 12 (33.3)                    |
| Orthostatic tachycardia | 0                   | 2 (33.3)                   | 0                           | 0                           | 2 (33.3)                     | 0                            | 4 (66.7)                      | 8 (22.2)                     |
| Orthostatic hypotension | 2 (16.7)            | 0                          | 0                           | 0                           | 0                            | 0                            | 3 (50.0)                      | 3 (8.3)                      |
| Vomiting                | 0                   | 0                          | 0                           | 0                           | 0                            | 1 (16.7)                     | 0                             | 1 (2.8)                      |
| Nausea                  | 0                   | 0                          | 0                           | 2 (33.3)                    | 0                            | 0                            | 0                             | 2 (5.6)                      |
| Dizziness               | 0                   | 0                          | 0                           | 1 (16.7)                    | 0                            | 1 (16.7)                     | 0                             | 2 (5.6)                      |
| Dysarthria              | 0                   | 0                          | 0                           | 0                           | 0                            | 0                            | 1 (16.7)                      | 1 (2.8)                      |
| Headache                | 2 (16.7)            | 0                          | 0                           | 0                           | 0                            | 1 (16.7)                     | 0                             | 1 (2.8)                      |
| Anxiety                 | 0                   | 0                          | 0                           | 0                           | 0                            | 0                            | 1 (16.7)                      | 1 (2.8)                      |
| Hypotension             | 0                   | 0                          | 0                           | 0                           | 1 (16.7)                     | 0                            | 0                             | 1 (2.8)                      |
| Blurred vision          | 0                   | 0                          | 0                           | 0                           | 0                            | 0                            | 1 (16.7)                      | 1 (2.8)                      |

### Online Resource 3

PK parameters for Japanese subjects by dosing group

| Parameter<br>(unit)                 | Arithmetic mean (% CV) |                   |                    |                    |                   |                   |                             |                             |                             |                             |                   |                   |
|-------------------------------------|------------------------|-------------------|--------------------|--------------------|-------------------|-------------------|-----------------------------|-----------------------------|-----------------------------|-----------------------------|-------------------|-------------------|
|                                     | 3 mg (n = 5)           |                   | 10 mg (n = 5)      |                    | 30 mg (n = 5)     |                   | 100 mg (n = 5)              |                             | 300 mg (n = 5)              |                             | 1000 mg (n = 5)   |                   |
|                                     | TAK-063                | M-I               | TAK-063            | M-I                | TAK-063           | M-I               | TAK-063                     | M-I                         | TAK-063                     | M-I                         | TAK-063           | M-I               |
| <b>Plasma</b>                       |                        |                   |                    |                    |                   |                   |                             |                             |                             |                             |                   |                   |
| C <sub>max</sub> (ng/mL)            | 16.1<br>(42)           | 13.3<br>(45)      | 30.2<br>(32)       | 20.8<br>(39)       | 55.7<br>(67)      | 36.9<br>(55)      | 89.9<br>(41)                | 78.1<br>(33)                | 98.2<br>(25)                | 84.1<br>(17)                | 264.0<br>(28)     | 234.8<br>(45)     |
| T <sub>max</sub> (h) <sup>a</sup>   | 4.0 (2.0,<br>4.0)      | 4.0 (2.0,<br>4.0) | 4.0 (2.0,<br>16.0) | 4.0 (3.0,<br>16.0) | 4.0 (3.0,<br>6.0) | 4.0 (4.0,<br>6.0) | 3.0 (3.0,<br>4.1)           | 3.0 (2.0,<br>4.1)           | 4.0 (2.0,<br>8.0)           | 4.0 (2.0,<br>4.0)           | 4.0 (2.0,<br>4.0) | 3.0 (3.0,<br>8.0) |
| AUC <sub>(0-inf)</sub><br>(ng·h/mL) | 250.3<br>(22)          | 206.4<br>(26)     | 659.2<br>(23)      | 488.7<br>(27)      | 1027.3<br>(61)    | 674.0<br>(65)     | 1459.1<br>(37) <sup>b</sup> | 1364.9<br>(27) <sup>b</sup> | 1636.0<br>(38) <sup>b</sup> | 1410.8<br>(46) <sup>b</sup> | 4931.4<br>(46)    | 4343.1<br>(47)    |
| T <sub>1/2</sub> (h)                | 15.9<br>(67)           | 16.5<br>(80)      | 18.2<br>(17)       | 20.1<br>(37)       | 17.8<br>(42)      | 15.4<br>(43)      | 20.7<br>(35) <sup>b</sup>   | 20.5<br>(33) <sup>b</sup>   | 20.3<br>(37) <sup>b</sup>   | 19.5<br>(52) <sup>b</sup>   | 11.7<br>(26)      | 11.9<br>(14)      |
| CL/F (L/h)                          | 12.5<br>(24)           | 15.6<br>(32)      | 15.8<br>(22)       | 21.9<br>(31)       | 35.2<br>(35)      | 55.5<br>(41)      | 75.8<br>(35) <sup>b</sup>   | 77.4<br>(27)                | 212.8<br>(50) <sup>b</sup>  | 266.4<br>(62)               | 233.8<br>(39)     | 283.5<br>(55)     |
| V <sub>z</sub> /F (L)               | 269.5<br>(49)          | 335.1<br>(57)     | 412.2<br>(23)      | 679.2<br>(69)      | 889.4<br>(50)     | 1226.9<br>(47)    | 2288.5<br>(59) <sup>b</sup> | 2272.3<br>(44)              | 6409.8<br>(60) <sup>b</sup> | 6862.4<br>(59)              | 3953.4<br>(44)    | 4763.4<br>(46)    |
| <b>Urine</b>                        |                        |                   |                    |                    |                   |                   |                             |                             |                             |                             |                   |                   |
| CL <sub>r</sub> (mL/h)              | 0.0<br>(NA)            | 3.0<br>(224)      | 0.0<br>(NA)        | 7.8<br>(47)        | 4.0<br>(85)       | 22.0<br>(73)      | 7.9<br>(67)                 | 17.4<br>(50)                | 5.9<br>(71)                 | 16.6<br>(53)                | 6.8<br>(57)       | 18.9<br>(47)      |

Abbreviations: CL/F, oral clearance; CL<sub>r</sub>, renal clearance; CV, coefficient of variation; M-I, metabolite; NA, not applicable; V<sub>z</sub>/F, volume of distribution

<sup>a</sup>T<sub>max</sub> is presented at the median (minimum, maximum)

<sup>b</sup>n = 4, terminal phase of the PK profile could not be characterized in some subjects

## Online Resource 4

PK parameters for non-Japanese subjects by dosing group

| Parameter<br>(unit)                 | Arithmetic mean (% CV) |                            |                   |                   |                    |                   |                             |                             |                             |                             |                    |                    |
|-------------------------------------|------------------------|----------------------------|-------------------|-------------------|--------------------|-------------------|-----------------------------|-----------------------------|-----------------------------|-----------------------------|--------------------|--------------------|
|                                     | 3 mg (n = 6)           |                            | 10 mg (n = 6)     |                   | 30 mg (n = 6)      |                   | 100 mg (n = 6)              |                             | 300 mg (n = 6)              |                             | 1000 mg (n = 6)    |                    |
|                                     | TAK-063                | M-I                        | TAK-063           | M-I               | TAK-063            | M-I               | TAK-063                     | M-I                         | TAK-063                     | M-I                         | TAK-063            | M-I                |
| <b>Plasma</b>                       |                        |                            |                   |                   |                    |                   |                             |                             |                             |                             |                    |                    |
| C <sub>max</sub> (ng/mL)            | 8.2<br>(21)            | 8.8<br>(39)                | 23.8<br>(35)      | 23.8<br>(28)      | 39.5<br>(47)       | 34.8<br>(41)      | 72.7<br>(57)                | 76.9<br>(75)                | 102.1<br>(13)               | 99.7<br>(21)                | 230.7<br>(41)      | 229.3<br>(49)      |
| T <sub>max</sub> (h) <sup>a</sup>   | 5.0 (2.0,<br>24.0)     | 3.5 (1.5,<br>24.0)         | 5.0 (2.0,<br>8.0) | 5.0<br>(3.0, 6.0) | 5.0 (3.0,<br>16.0) | 3.5 (3.0,<br>6.0) | 3.5 (1.5,<br>6.0)           | 4.0 (1.5,<br>6.0)           | 3.5 (1.9,<br>4.0)           | 3.5 (2.9,<br>8.0)           | 4.0 (3.0,<br>12.0) | 5.0 (3.0,<br>12.0) |
| AUC <sub>(0-inf)</sub><br>(ng·h/mL) | 240.4<br>(42)          | 257.6<br>(59) <sup>c</sup> | 507.9<br>(30)     | 526.0<br>(20)     | 983.9<br>(20)      | 903.9<br>(38)     | 1364.9<br>(44) <sup>c</sup> | 1584.6<br>(66) <sup>c</sup> | 2165.7<br>(39) <sup>b</sup> | 2371.2<br>(59) <sup>b</sup> | 6502.0<br>(95)     | 7913.4<br>(118)    |
| T <sub>1/2</sub> (h)                | 24.2<br>(34)           | 24.0<br>(29) <sup>c</sup>  | 21.3<br>(17)      | 22.4<br>(10)      | 22.6<br>(18)       | 24.1<br>(17)      | 27.8<br>(36) <sup>c</sup>   | 25.9<br>(31) <sup>c</sup>   | 20.0<br>(15) <sup>b</sup>   | 18.9<br>(18) <sup>b</sup>   | 17.0<br>(44)       | 18.2<br>(34)       |
| CL/F (L/h)                          | 15.2<br>(58)           | 15.5<br>(58)               | 21.2<br>(29)      | 19.7<br>(21)      | 31.4<br>(18)       | 36.4<br>(29)      | 84.0<br>(39) <sup>c</sup>   | 83.0<br>(49)                | 159.0<br>(47) <sup>b</sup>  | 159.7<br>(52)               | 230.6<br>(47)      | 228.9<br>(53)      |
| V <sub>z</sub> /F (L)               | 521.6<br>(57)          | 494.0<br>(44)              | 627.3<br>(19)     | 628.1<br>(13)     | 1009.2<br>(19)     | 1246.8<br>(31)    | 3213.2<br>(38) <sup>c</sup> | 2896.6<br>(41)              | 4731.5<br>(54) <sup>b</sup> | 4514.6<br>(57)              | 6380.3<br>(87)     | 6196.3<br>(78)     |
| <b>Urine</b>                        |                        |                            |                   |                   |                    |                   |                             |                             |                             |                             |                    |                    |
| CL <sub>r</sub> (mL/h)              | 0.0 (NA)               | 0.0 (NA)                   | 0.0 (NA)          | 2.5 (160)         | 1.1 (179)          | 8.8 (100)         | 4.2 (84)                    | 16.1 (47)                   | 6.2 (63)                    | 14.8 (53)                   | 6.8 (61)           | 15.4 (51)          |

CV, coefficient of variation; M-I, metabolite; NA, not applicable

<sup>a</sup>T<sub>max</sub> is presented at the median (minimum, maximum)

<sup>b</sup>n = 4, terminal phase of the PK profile could not be characterized in some subjects

<sup>c</sup>n = 5, terminal phase of the PK profile could not be characterized in some subjects

## Online Resource 5

TAK-063 and M-I concentration time profiles across all subjects by dosing group, stratified by race

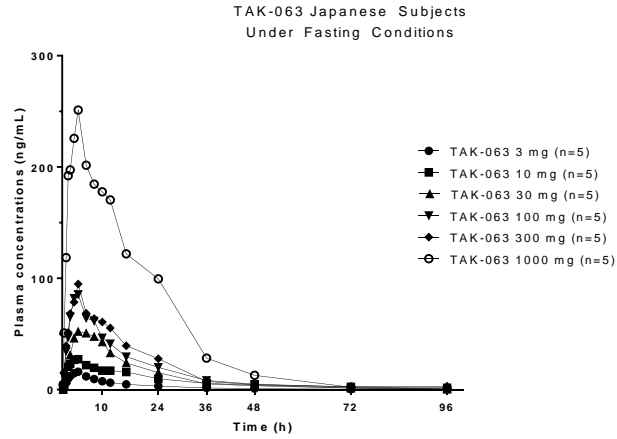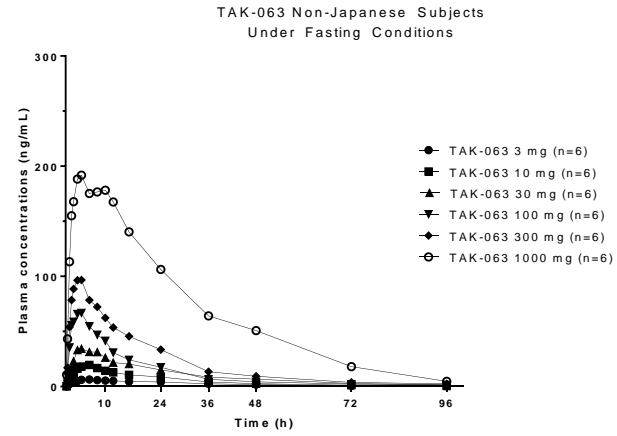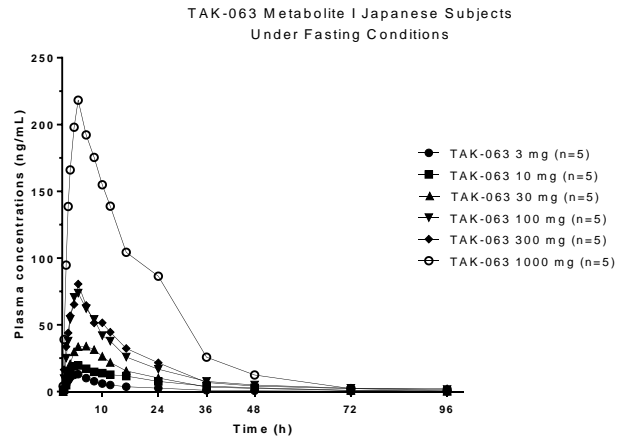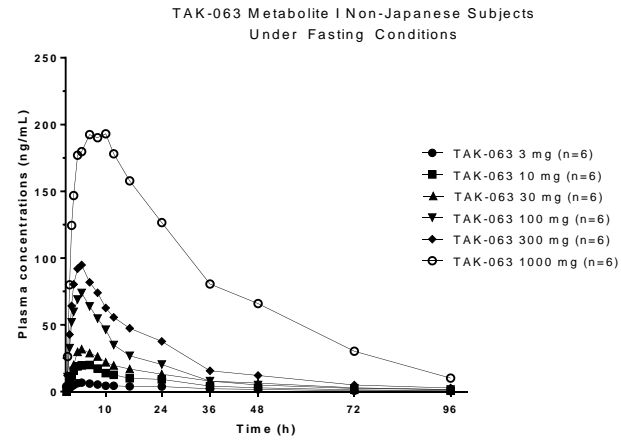

## Online Resource 6

Statistical analysis of standardized domain scores from neurocognitive tests under the fasting condition

|                                                     | Cognitive flexibility   |       | Composite memory        |       | Executive functioning   |       | Processing speed        |       | Psychomotor speed       |        | Reaction time           |       | Reasoning               |       | Sustained attention     |       | Verbal memory           |       | Visual memory           |       | Working memory          |       |
|-----------------------------------------------------|-------------------------|-------|-------------------------|-------|-------------------------|-------|-------------------------|-------|-------------------------|--------|-------------------------|-------|-------------------------|-------|-------------------------|-------|-------------------------|-------|-------------------------|-------|-------------------------|-------|
|                                                     | Difference <sup>a</sup> |       | Difference <sup>a</sup> |       | Difference <sup>a</sup> |       | Difference <sup>a</sup> |       | Difference <sup>a</sup> |        | Difference <sup>a</sup> |       | Difference <sup>a</sup> |       | Difference <sup>a</sup> |       | Difference <sup>a</sup> |       | Difference <sup>a</sup> |       | Difference <sup>a</sup> |       |
|                                                     | 2 h                     | 6 h   | 2 h                     | 6 h   | 2 h                     | 6 h   | 2 h                     | 6 h   | 2 h                     | 6 h    | 2 h                     | 6 h   | 2 h                     | 6 h   | 2 h                     | 6 h   | 2 h                     | 6 h   | 2 h                     | 6 h   | 2 h                     | 6 h   |
| 3 mg                                                | 1.3                     | 2.9   | -7.9                    | -1.4  | 0.4                     | 2.9   | 2.2                     | 2.5   | -1.5                    | -1.8   | 4.1                     | 1.5   | 5.7                     | 6.9   | 4.6                     | 15.0  | 0.9                     | -4.8  | -10.3                   | 4.5   | 5.3                     | 9.9   |
| 10 mg                                               | -3.1                    | -10.0 | -5.2                    | -1.9  | -2.7                    | -10.0 | 0.7                     | 0.2   | -8.5                    | -9.6   | -2.3                    | -5.6  | 10.8                    | 2.2   | 0.7                     | 3.6   | -4.0                    | 2.9   | -3.3                    | -4.4  | 1.1                     | 2.3   |
| 30 mg                                               | 0.2                     | -1.9  | 2.8                     | 7.5   | 0.5                     | -1.2  | 4.3                     | 2.2   | -1.7                    | -3.7   | 3.1                     | -2.8  | 6.4                     | -0.6  | 10.3                    | 2.5   | 12.4                    | 3.8   | -5.2                    | 8.3   | 6.5                     | -2.2  |
| 100 mg                                              | -20.2                   | -5.6  | -24.1                   | -13.5 | -17.8                   | -2.2  | -6.1                    | -4.7  | -15.2                   | -11.4  | -15.6                   | -3.4  | 4.6                     | 2.0   | -7.0                    | -0.1  | -24.0                   | -12.0 | -15.4                   | -8.3  | -3.8                    | -6.2  |
| 300 mg                                              | -30.9                   | -28.4 | -26.9                   | -19.6 | -29.0                   | -26.4 | -17.6                   | -1.5  | -18.0                   | -11.1  | -10.3                   | -4.1  | 0.5                     | -2.0  | -9.0                    | -8.1  | -26.7                   | -17.3 | -17.2                   | -14.0 | -3.1                    | -1.4  |
| 1000 mg                                             | -19.6                   | -15.6 | -16.6                   | -8.6  | -16.6                   | -14.1 | -17.9                   | -19.7 | -18.7                   | -22.7  | -7.1                    | -16.5 | -0.5                    | -0.1  | -5.0                    | 0.7   | -10.0                   | -5.8  | -14.5                   | -6.0  | -2.5                    | -2.7  |
| <i>P</i> value for overall dose effect <sup>b</sup> | 0.013                   | 0.010 | <0.001                  | 0.051 | 0.032                   | 0.015 | <0.001                  | 0.001 | <0.001                  | <0.001 | 0.007                   | 0.079 | 0.450                   | 0.797 | 0.311                   | 0.189 | <0.001                  | 0.314 | 0.049                   | 0.038 | 0.527                   | 0.135 |

ANCOVA; analysis of covariance

<sup>a</sup>TAK-063 least square means – placebo least square means on change from baseline; decreased score is indicative of impairment

<sup>b</sup>*P* values based on the comparison between each TAK-063 dose level and placebo within the frame of the ANCOVA model
